# Supplementary material
Source: publisher figshare collection journal article supplement (https://acs.figshare.com/ndownloader/files/3594096)
Supplement: Supplementary file 1 [file 3594096]

## Supplementary information

**Table 8 of the paper.** The bio-oil components distribution. In this version with data on wet basis included.

|                                     | On wet basis |           |            |           | On dry basis |           |            |           |
|-------------------------------------|--------------|-----------|------------|-----------|--------------|-----------|------------|-----------|
| Pyrolysis temperature (°C)          | Wood oil     | Straw oil | Lignin oil | Algae Oil | Wood oil     | Straw oil | Lignin oil | Algae oil |
| Water (wt.%) <sup>a</sup>           | 27.3         | 25.7      | 27.4       | 26.6      | -            | -         | -          | -         |
| Light fraction (wt %) <sup>b</sup>  | 29.7         | 28.8      | 25.5       | 16.1      | 40.9         | 38.8      | 35.2       | 21.9      |
| Medium fraction (wt %) <sup>c</sup> | 22.5         | 22.9      | 28.6       | 30.8      | 30.9         | 30.8      | 39.4       | 42.0      |
| Heavy fraction (wt %) <sup>d</sup>  | 3.0          | 2.8       | 2.5        | 3.8       | 4.1          | 3.8       | 3.4        | 5.2       |
| Residual <sup>e</sup> (char)        | 17.5         | 19.8      | 15.9       | 22.7      | 24.1         | 26.6      | 21.9       | 30.9      |

<sup>a</sup>determined by Karl Fischer, <sup>b</sup>determined as the mass loss appearing from room temperature to 200 °C of the TGA curve and substrated the water content, <sup>c</sup>determined as the mass loss from 200 to 500 °C on TGA curve, <sup>d</sup>determined as the mass loss from 500 to 950 °C on TGA curve, <sup>e</sup>the residual char after heating to 950 °C.

**Table 10 of the paper.** The bio-oil components distribution. In this version with data on wet basis included.

|                                     | On wet basis |                   | On dry basis |                   |
|-------------------------------------|--------------|-------------------|--------------|-------------------|
| Pyrolysis temperature (°C)          | Lignin oil   | Lignin bottom oil | Lignin oil   | Lignin bottom oil |
| Water (wt.%) <sup>a</sup>           | 27.4         | 15.3              | -            | -                 |
| Light fraction (wt %) <sup>b</sup>  | 25.5         | 7.7               | 35.2         | 9.1               |
| Medium fraction (wt %) <sup>c</sup> | 28.6         | 50.4              | 39.4         | 59.5              |
| Heavy fraction (wt %) <sup>d</sup>  | 2.5          | 4.1               | 3.4          | 4.8               |
| Residual <sup>e</sup> (char)        | 15.9         | 22.5              | 21.9         | 26.6              |

<sup>a</sup>determined by Karl Fischer, <sup>b</sup>determined as the mass loss appearing from room temperature to 200 °C of the TGA curve and substrated the water content, <sup>c</sup>determined as the mass loss from 200 to 500 °C on TGA curve, <sup>d</sup>determined as the mass loss from 500 to 950 °C on TGA curve, <sup>e</sup> the residual char after heating to 950 °C.

### Some comments regarding the use of isopropanol for condensation of the bio oil from the pyrolysis gas

In this study isopropanol was used as a condensing solvent, and after the pyrolysis experiments the isopropanol was removed by a rotary vacuum evaporator at a temperature of 30 °C and using a soft sub-pressure. The isopropanol solvent removal procedure are mentioned by I.Fonts et al. (Ind. Eng. Chem. Res., Vol 48, No .4, 2009; Anal. Appl. Pyrolysis 85 (2009) 184-191). A pure isopropanol (having a boiling point of 82 °C at atmospheric pressure) was used to determine a set point pressure (the temperature is fixed 30 °C to avoid an aging of the bio-oil) in which the isopropanol start to evaporate. The mixture of isopropanol and bio-oil was distilled at those conditions. Regarding low boiling point species in the bio oil acetic acid is considered to be present at a relatively high concentration in the bio-oil and has a boiling point of 119 °C (at atmospheric pressure) next to water with a boiling point of 100 °C (at atmosphere pressure). The bio-oil components were identified with GC-MS (The GC-MS identified components of lignin and wood oil are shown in table 1). We used a wood bio-oil (that has the highest acetic acid concentration in the bio-oil) to quantify the acetic acid concentrations of a bio-oil liquid sample including isopropanol and the bio-oil sample after solvent removal (see figure 1). It was observed that 37% the acetic acid (corresponding to 1.9 %wt of the wood bio-oil) is lost during solvent removal. Also wood oil was used as condensing solvent during a wood pyrolysis experiment and the pH value of the obtained bio-oil was 3.04. This is slightly lower than when using isopropanol as solvent where a pH value of 3.2 is obtained. Thus the isopropanol solvent removal has a small influence on the pH value of bio-oil.

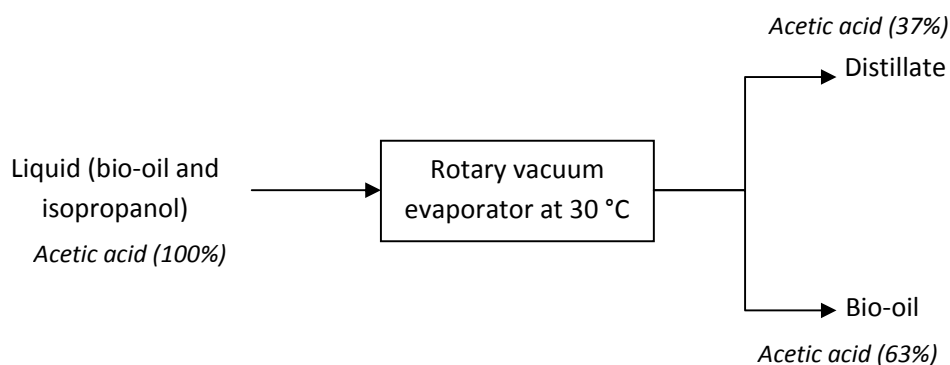

Figure 1: Distribution of acetic acid after removing solvent

Table 1: The GC-MS results on % identified peak area<sup>a</sup>

|                                          | Lignin oil     | Wood oil | Boiling point (°C) |
|------------------------------------------|----------------|----------|--------------------|
| Acids                                    | 6.15           | 25.88    |                    |
| Acetic acid                              | 6.15           | 25.88    | 119                |
| Nonaromatic ketones                      | 2.55           | 13.3     |                    |
| Hydroxyacetone                           | 2.55           | 7.16     | 146                |
| 1,2-ethanediol, monoacetate              | - <sup>a</sup> | 3.93     | 182                |
| 1-(acetyloxy)-2-propanone                | -              | 0.73     | 176                |
| 2,3-butanedione                          | -              | -        |                    |
| 2-hydroxy-3-methyl-2-cyclopenten-1-one   | -              | 0.69     |                    |
| 2-methyl-cyclopentanone                  | -              | 0.79     | 141                |
| Furans                                   | 1.01           | 8.61     |                    |
| Furfural                                 | 0.51           | 5.16     | 162                |
| 5-methyl-furfural                        | -              | -        |                    |
| Furfuryl alcohol                         | 0.50           | 1.35     | 170                |
| 5-hydroxymethylfurfural                  | -              | -        |                    |
| γ-crotonolactone                         | -              | -        |                    |
| Carbohydrates                            | 5.5            | 7.1      |                    |
| Glycerol                                 | 2.91           | -        | 290                |
| Levogluconan                             | 2.55           | 7.10     | 384                |
| Lignin-derived phenols                   | 2.89           | 0.48     |                    |
| Phenol                                   | 1.52           | 0.48     | 182                |
| 2,4-dimethyl-phenol                      | -              | -        |                    |
| 4-methyl-phenol                          | -              | -        |                    |
| p-ethylphenol                            | 0.73           | -        | 219                |
| 2,4,6-trihydroxyphenyl-2-pentanone       | 0.64           | -        |                    |
| Guaiacols                                | 27.4           | 11.4     |                    |
| o-guaiacol                               | 6.18           | 1.85     | 205                |
| p-methylguaiacol                         | 3.21           | 1.27     | 222                |
| p-ethylguaiacol                          | 2.95           | 0.75     | 236                |
| p-vinylguaiacol                          | 9.35           | 2.12     | 224                |
| Isoeugenol                               | 2.29           | 2.48     | 266                |
| Acetoguaiacol                            | 0.80           | -        |                    |
| Coniferyl alcohol                        | 2.62           | 2.93     |                    |
| Syringols                                | 18.3           | 10.3     |                    |
| Syringol                                 | 9.03           | 3.08     | 261                |
| Methoxyeugenol                           | 3.57           | 2.50     |                    |
| 3',5'-dimethoxyacetophenone              | 3.37           | 2.09     |                    |
| Syringaldehyde                           | 0.72           | 0.74     |                    |
| Acetosyringone                           | 1.61           | 1.89     |                    |
| Methoxy benzenes                         | 4.43           | 3.05     |                    |
| Trimethoxybenzene                        | 1.95           | 1.29     |                    |
| 1,2,3-trimethoxy-5-methyl-benzene        | 0.80           | -        |                    |
| Benzenemethanol, 2,5-dimethoxy-, acetate | 1.68           | 1.76     |                    |

<sup>a</sup>Components with a peak area less than 0.5% are not listed in the table
